# Supplementary material
Source: PubMed Central journal article supplement (PMC10082357)
Supplement: BLOOD_BLD-2022-016056-mmc4.pdf [file BLOOD_BLD-2022-016056-mmc4.pdf]

### **Supplementary Material:**

Sample preparation and WGS: DNA was extracted from peripheral blood samples by standard procedures that generate high molecular weight DNA suitable for genome sequencing (organic extraction using phenol-chloroform, or Qiagen columns). While a skin biopsy is the preferred method for germline testing, peripheral blood samples are a recognized alternative for people without active cancer and were utilized due to limitations in feasibility. WGS was performed at HudsonAlpha Sequencing Core (Huntsville, Alabama). Burrows-Wheeler Aligner (BWA)<sup>1</sup> and the GATK Haplotype Caller<sup>2</sup> were used for alignment and genotype calling. More specifically, paired-end reads were aligned to the GRCh38 human reference (GCA\_000001405.15\_GRCh38\_no\_alt\_analysis\_set.fa) using BWA (BWA-ALN v0.7.12) followed by the GATK3 best-practices workflow implemented in the Genome Analysis Toolkit (GATK v3.4.0)<sup>3</sup>. All samples passed sequencing quality control (QC) with average 30X coverage. All genomic data have been submitted to dbGAP (study accession: [phs001738.v1.p1](#)).

Pedigree-informed quality control: After genotype calling, sex and relatedness checks were performed on all samples to identify potential sample swaps using standard approaches<sup>4</sup>. Non-mendelian transmission from parents to offspring was confirmed using PEDCHECK<sup>5</sup>. Principal Components Analysis (PCA)<sup>6</sup> was performed to determine genetic ancestry using the 1000 Genomes Project<sup>7</sup> as a reference cohort (Figure S1). The resulting ancestry estimates guided which gnomAD reference cohorts were used for minor allele frequency (MAF) filtering. A MAF threshold of 1% was applied to the total gnomAD frequency and major subpopulations (AFR and NFE) and a threshold of 5% for all minor subpopulations (AMR, ASJ, EAS, FIN, SAS, and OTH).

### Candidate variant review and ACMG classification

REVEL scores were utilized to evaluate missense variants in coding regions, where REVEL  $\leq 0.290$  met supporting criteria for benignity (BP4) and REVEL  $\geq 0.644$  met supporting criteria for deleteriousness (PP3). Non-coding variants resulting in an indel or with a RegBase score  $>10$  were considered to meet supporting evidence for deleteriousness based on *in silico* data (PP3). Genes with a missense z-score  $> 3.09$  were considered to have low rates of missense variation (PP2). Rarity in population databases was defined as a variant having  $\leq 6$  alleles in gnomAD v3.1.2 (PM2\_supporting). Co-segregation (PP1) was assessed by counting meioses of affected individuals and obligate carriers in and across pedigrees. This evidence was considered as supporting for  $\geq 1$  informative meiosis, moderate for  $\geq 3$ , and strong for  $\geq 5$ .

## References:

1. Li H, Durbin R. Fast and accurate short read alignment with Burrows-Wheeler transform. *Bioinformatics*. 2009;25(14):1754-1760.
2. Ren S, Ahmed N, Bertels K, Al-Ars Z. GPU accelerated sequence alignment with traceback for GATK HaplotypeCaller. *BMC Genomics*. 2019;20(Suppl 2):184.
3. Van der Auwera GA, Carneiro MO, Hartl C, et al. From FastQ data to high confidence variant calls: the Genome Analysis Toolkit best practices pipeline. *Curr Protoc Bioinformatics*. 2013;43:11 10 11-11 10 33.
4. Conomos MP, Reiner AP, Weir BS, Thornton TA. Model-free Estimation of Recent Genetic Relatedness. *Am J Hum Genet*. 2016;98(1):127-148.
5. O'Connell JR, Weeks DE. PedCheck: a program for identification of genotype incompatibilities in linkage analysis. *Am J Hum Genet*. 1998;63(1):259-266.
6. Price AL, Patterson NJ, Plenge RM, Weinblatt ME, Shadick NA, Reich D. Principal components analysis corrects for stratification in genome-wide association studies. *Nat Genet*. 2006;38(8):904-909.
7. Siva N. 1000 Genomes project. *Nat Biotechnol*. 2008;26(3):256.

## Supplementary Table Legends

**Table S1. Candidate genes used during variant prioritization.** List of genes included in Supplemental Figure 2 including the source of contribution.

**Table S2. Segregating SNV/INDELS.** (A) C1-C4 Coding variants. (B) NC1 and NC2 Noncoding variants.

**Table S3. Additional Detail for Prioritized germline HL candidates.** Prioritized variants for each family based on segregation and predicted deleteriousness. Variant coordinate information is provided in terms of the hg38 reference genome. The total gnomAD v3.0 minor allele frequency and ethnically relevant frequency for each variant are provided in addition to the SNP-based inferred ethnicity of the pedigree. Number of variants meeting C1-C4 and NC1-NC8 for each pedigree are also provided. \* where evidence applied based on hypothesis of genotype-phenotype correlation.

**Table S4. Noncoding variants that segregate in multiple families.** Prioritized noncoding variants that were observed segregating with HL affection status for more than one family. Variant position, genotype, gnomAD v3.0 genome minor allele frequency, RegBase prediction scores, and interpretation of FIMO difference between reference and alternative allele are included. Regbase scores greater than or equal to 15 are highlighted grey.

**Table S5. Segregating CNVs.** (A) High ranking CNVs. (B) CNVs potentially impacting candidate genes.

## Supplemental Figure Legends

**Figure S1. Venn diagram of candidate genes included for prioritization.** Diagram depicts sources of various candidate genes included in our analysis.

**Figure S2: Quality control of dataset.** (A) Ethnicity estimation using PCA. The majority (207, 88.5%) of individuals were of European ancestry, followed by African (26, 11.1%), and South Asian ancestries (1, 0.4%) based on principal component analysis with the 1000 Genomes Project Phase 3 dataset. (B) Genetically determined relatedness among individuals included in the cohort.

**Figure S3. Non-coding variant frequency by priority.** Histogram of variant frequency per priority level (NC1-NC8) for each pedigree.

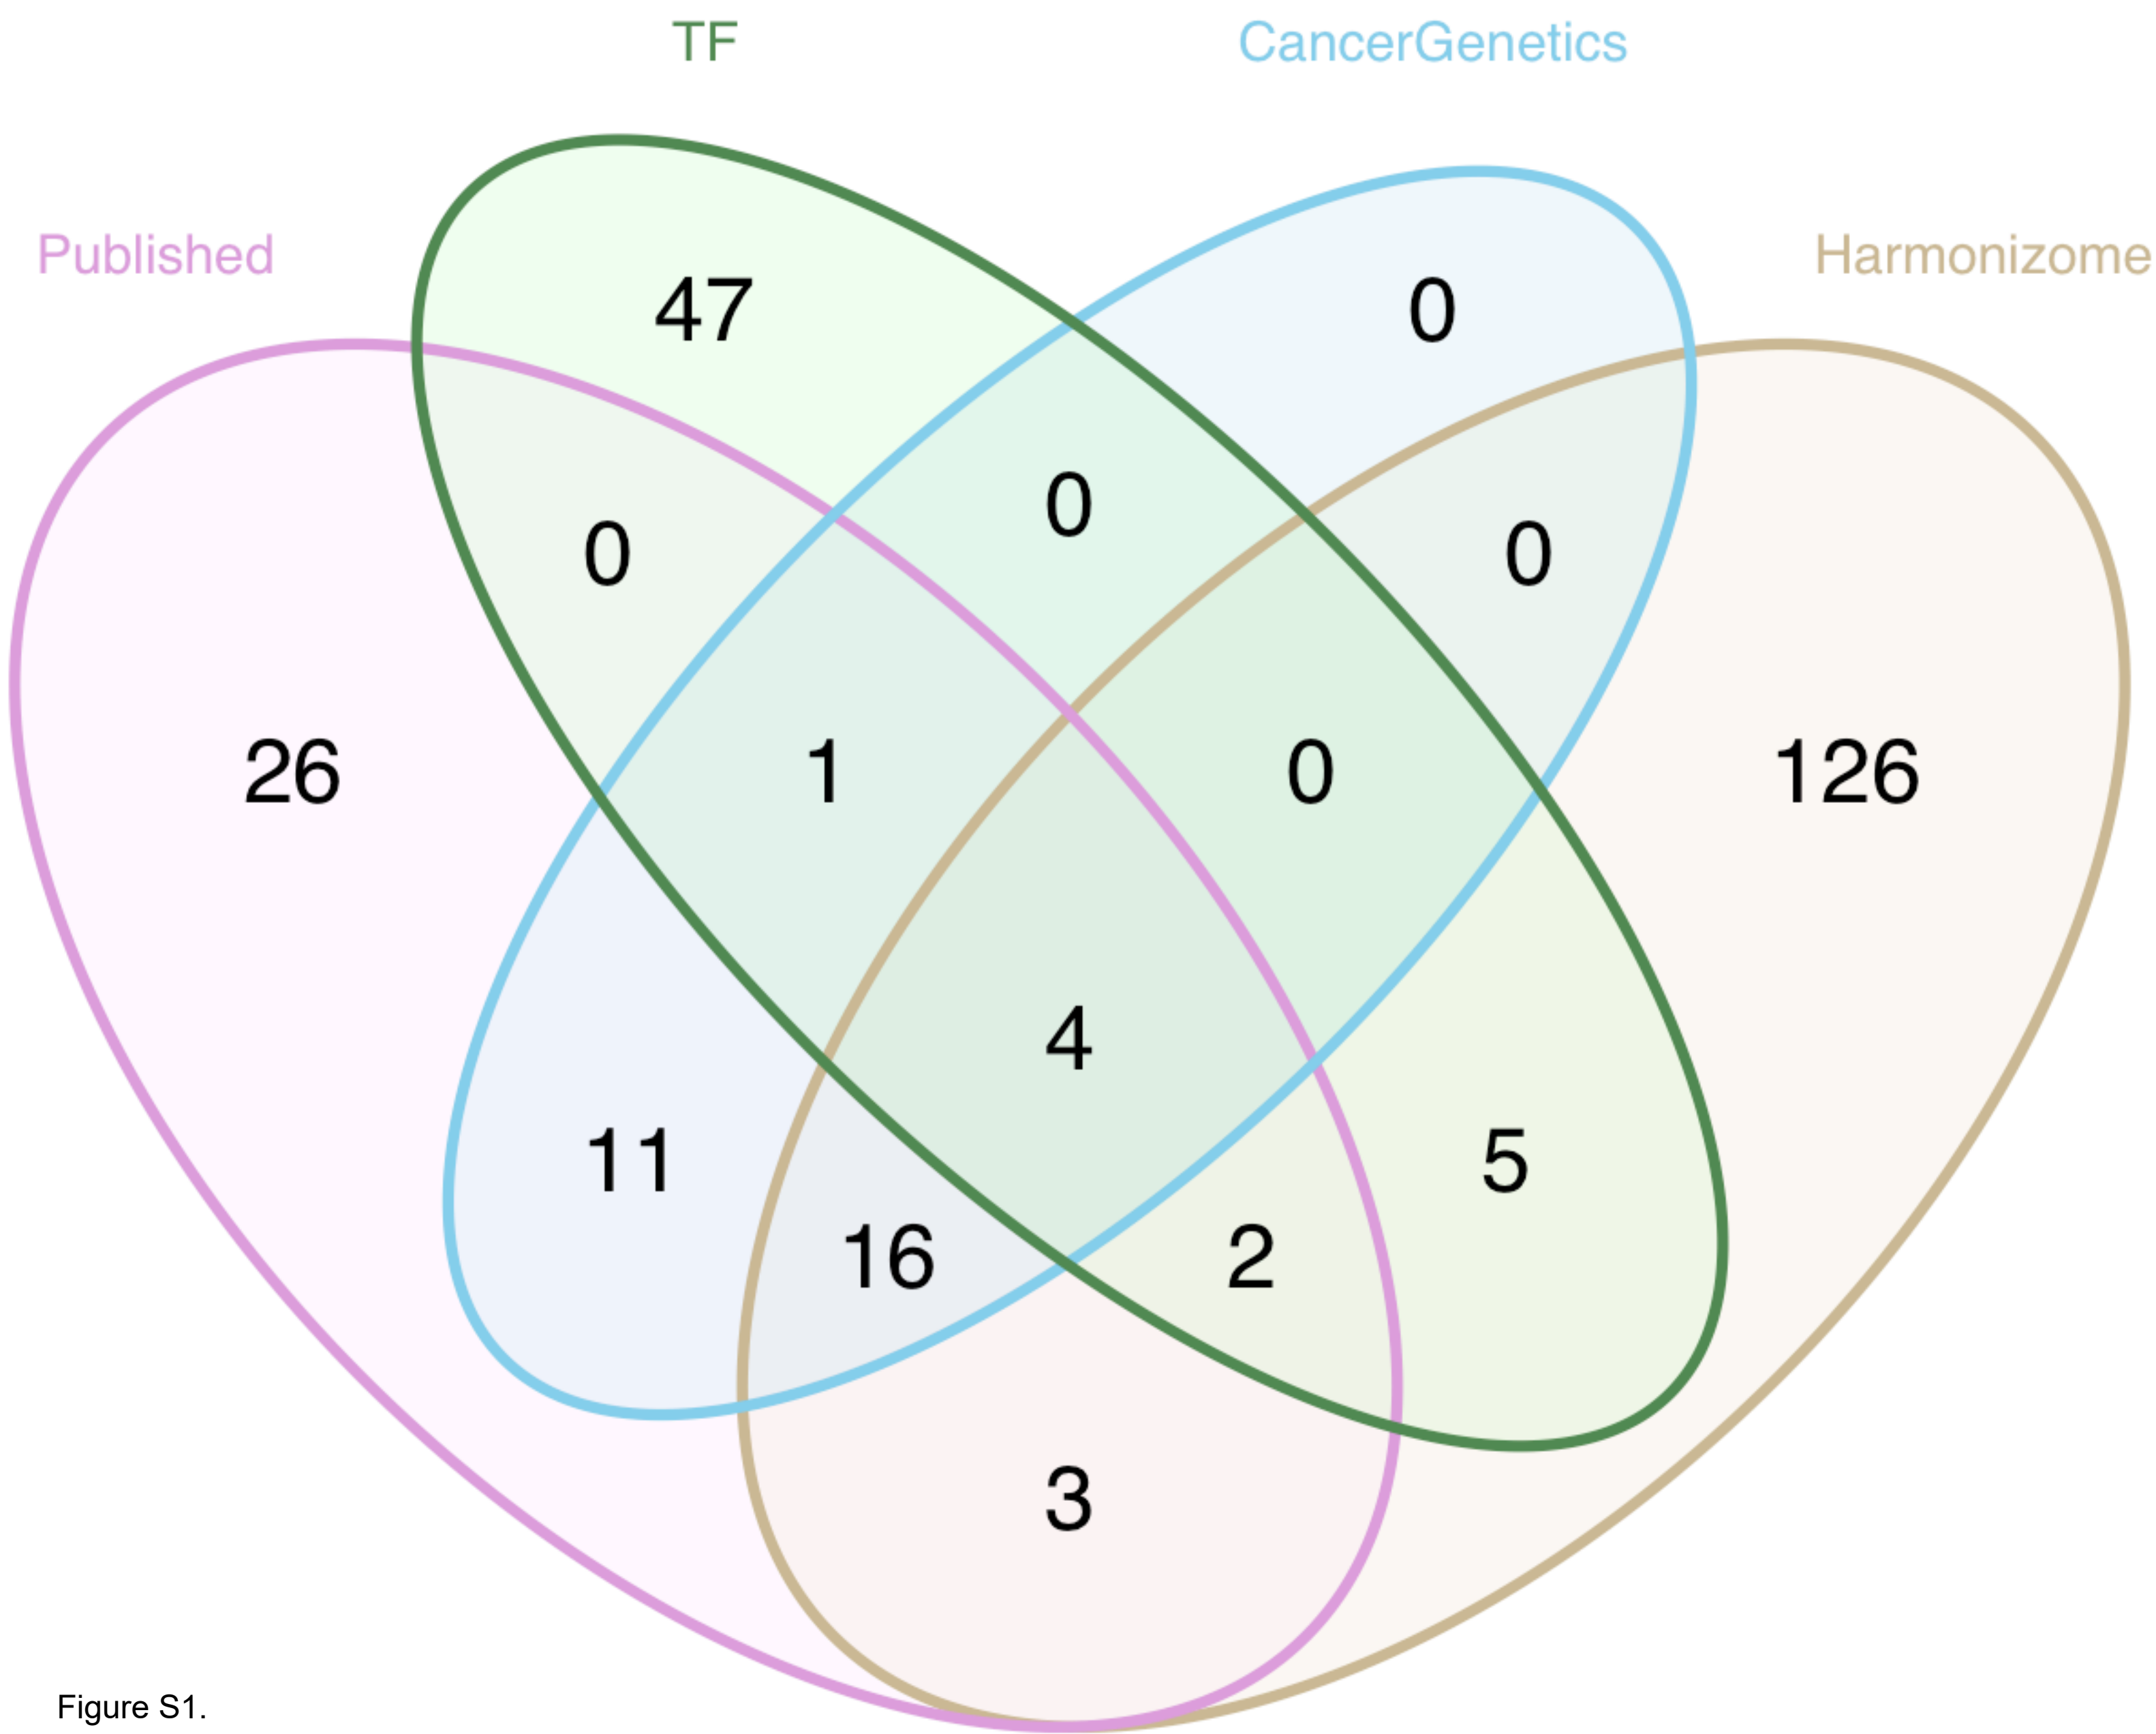

Figure S1.

A

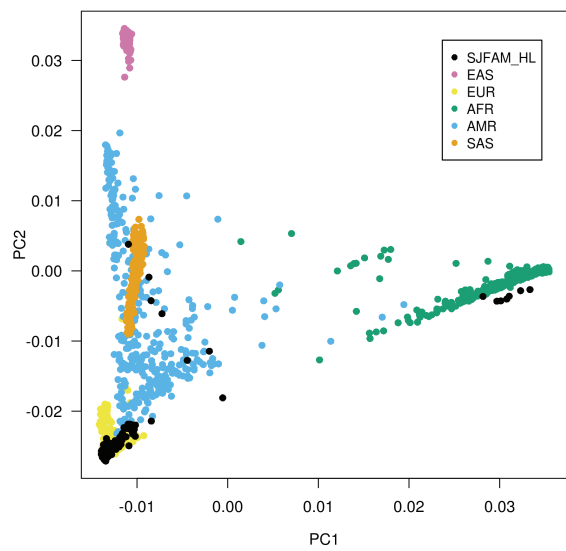

B

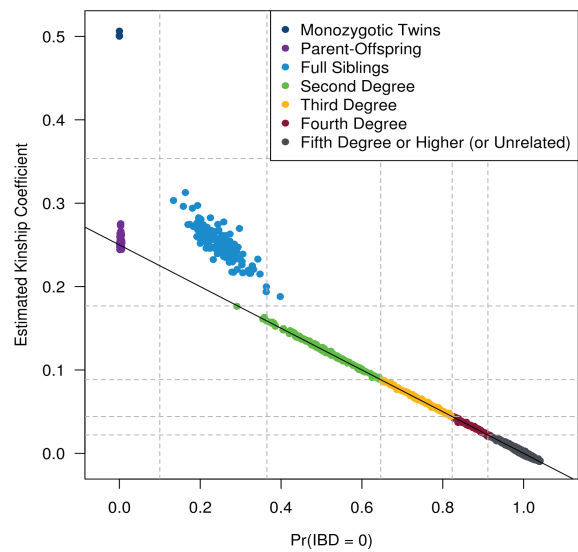

Figure S2.

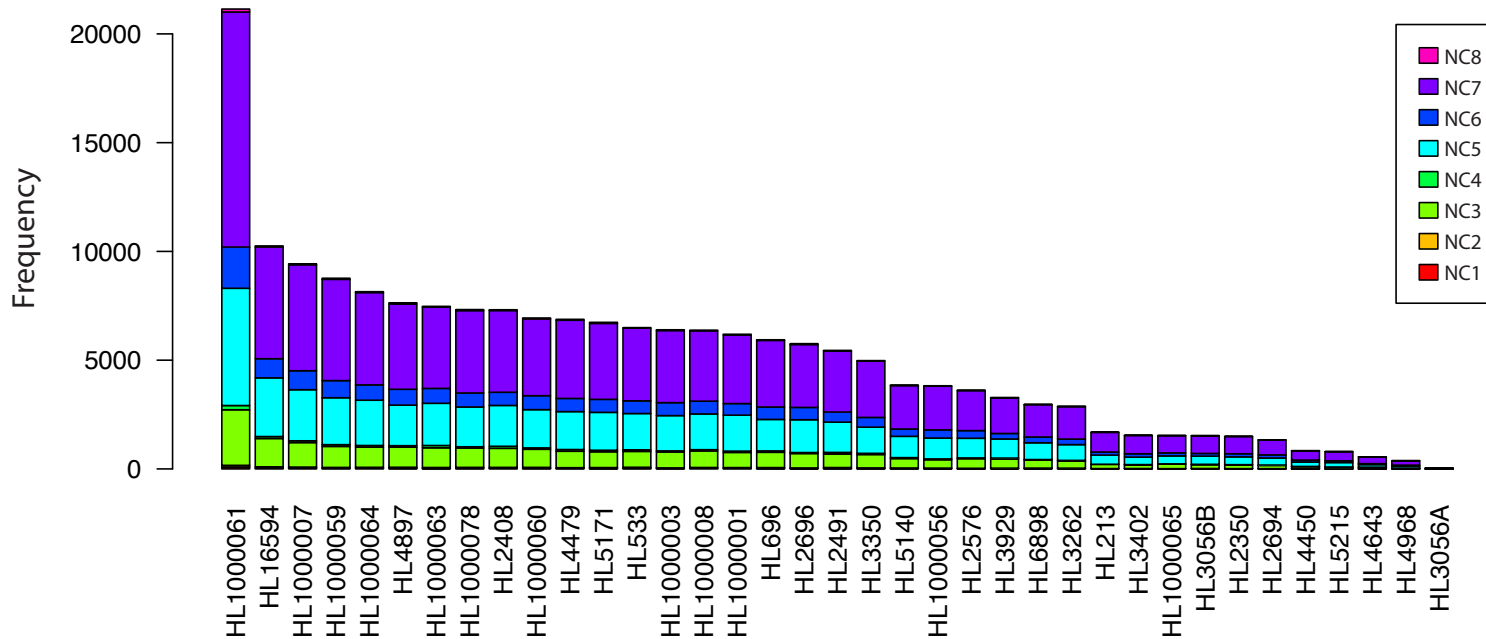

Figure S3.

**Supplemental Table 2. Recurrent non-coding variants.**

| Gene           | Type       | Location       | Genotype | MAF**    | NC<br>priority | REG<br>PHRED | CAN<br>PHRED | PAT<br>PHRED | FIMO                                                 |
|----------------|------------|----------------|----------|----------|----------------|--------------|--------------|--------------|------------------------------------------------------|
| <i>DDB2</i>    | intronic   | chr11:47233910 | C/A      | 0.0012   | 1              | 14.417       | 5.955        | 1.592        | GAIN - CRX                                           |
| <i>GATA3</i>   | intronic   | chr10:8061430  | G/A      | 0.0079   | 1              | 15.393       | 15.328       | 19.140       | LOSS - TCF12 & TAL1::TCF3                            |
| <i>RUNX3</i>   | intronic   | chr1:24912674  | A/G      | 0.0028   | 1              | 15.622       | 4.950        | 6.282        | COMPLEX - EBF1 gain, Esrra loss                      |
| <i>MC1R</i>    | intergenic | chr16:89915484 | G/C      | 0.0024   | 2              | 16.559       | 2.413        | 7.198        | COMPLEX - GLIS3 loss, ZBTB7B loss                    |
| <i>EZH2</i>    | intronic   | chr7:148863895 | G/A      | 0.0036   | 1              | 15.084       | 6.122        | 3.693        | COMPLEX - GRHL1 loss, GRHL2 loss, SOX8 gain          |
| <i>HLA-A</i>   | intronic   | chr6:29944961  | T/A      | 9.33E-05 | 1              | 11.223       | 8.922        | 1.050        | COMPLEX - HSF2 loss, STAT1 gain, PAX1 gain           |
| <i>PTPN1</i>   | intergenic | chr20:50463747 | C/A      | 0.0049   | 2              | 4.558        | 10.977       | 2.283        | COMPLEX - MGA loss                                   |
| <i>KLHDC8B</i> | UTR5       | chr3:49171662* | C/T      | 0.0048   | 1              | 27.085       | 2.526        | 21.838       | COMPLEX - NFIC gain, NFIX gain                       |
| <i>PAX5</i>    | intronic   | chr9:37025905  | T/C      | 0.0011   | 1              | 18.930       | 9.022        | 1.457        | COMPLEX - NFYB loss                                  |
| <i>IRF8</i>    | intronic   | chr16:85906807 | A/G      | 0.0083   | 1              | 10.177       | 4.758        | 6.532        | COMPLEX - Pax2 gain                                  |
| <i>RUNX3</i>   | intronic   | chr1:24960209  | G/A      | 0.0032   | 1              | 11.402       | 2.559        | 4.655        | COMPLEX - PLAG1 gain, INSM1 gain                     |
| <i>PDGFRA</i>  | intergenic | chr4:54226125  | G/A      | 0.0049   | 1              | 18.510       | 7.552        | 4.690        | COMPLEX - PLAG1 loss, THAP1 gain                     |
| <i>CDKN2C</i>  | UTR5       | chr1:50970305  | C/T      | 6.00E-04 | 1              | 34.180       | 14.824       | 22.060       | COMPLEX - Pparg::Rxra gain, ZNF263 loss, IRF3 gain   |
| <i>PAX5</i>    | intronic   | chr9:36969034  | G/A      | 3.49E-05 | 1              | 10.300       | 4.690        | 10.977       | COMPLEX - XBP1 loss, PAX9 loss, Atf3 loss, Atf1 loss |
| <i>TBX21</i>   | intergenic | chr17:47758718 | TC/T     | 0.0036   | 1              | N/A          | N/A          | N/A          | COMPLEX - YY1 gain                                   |
| <i>LPXN</i>    | intronic   | chr11:58570075 | G/A      | 0.0056   | 2              | 7.893        | 18.568       | 0.991        | COMPLEX - ZEB1 gain, SNAI2 gain, ID4 gain            |
| <i>IL10</i>    | downstream | chr1:206766846 | A/C      | 0.0054   | 1              | 9.310        | 2.983        | 10.724       | COMPLEX - ZNF410 gain, RREB1 gain, ONECUT3 loss      |
| <i>CDH1</i>    | intronic   | chr16:68765049 | C/T      | 0.0032   | 1              | 18.049       | 13.980       | 1.276        | NOCHANGE                                             |
| <i>CMIP</i>    | intronic   | chr16:81543016 | C/T      | 0.0039   | 2              | 7.355        | 7.317        | 11.132       | NOCHANGE                                             |
| <i>ERCC6</i>   | intergenic | chr10:49574203 | T/C      | 0.0051   | 2              | 10.127       | 6.376        | 1.714        | NOCHANGE                                             |
| <i>KLHDC8B</i> | intronic   | chr3:49174099  | G/A      | 0.0054   | 2              | 17.523       | 5.651        | 6.577        | NOCHANGE                                             |
| <i>LYN</i>     | intronic   | chr8:55918648  | CG/C     | 0.0039   | 2              | N/A          | N/A          | N/A          | NOCHANGE                                             |
| <i>LYN</i>     | intronic   | chr8:55960828  | A/G      | 0.0034   | 2              | 22.905       | 20.128       | 18.055       | NOCHANGE                                             |
| <i>MAP3K7</i>  | intergenic | chr6:90473200  | T/TTTTTA | 0.0063   | 1              | N/A          | N/A          | N/A          | NOCHANGE                                             |
| <i>MYB</i>     | intronic   | chr6:135202691 | A/G      | 0.006    | 2              | 10.887       | 4.985        | 5.071        | NOCHANGE                                             |
| <i>PAX5</i>    | intronic   | chr9:37005648  | T/C      | 0.0011   | 1              | 12.491       | 5.920        | 3.280        | NOCHANGE                                             |
| <i>RB1</i>     | intronic   | chr13:48318338 | C/T      | 0.006    | 2              | 18.849       | 5.405        | 11.154       | NOCHANGE                                             |
| <i>SDHC</i>    | intronic   | chr1:161352118 | ACT/A    | 0.0054   | 2              | N/A          | N/A          | N/A          | NOCHANGE                                             |

\*ClinVar designated pathogenic and linked to Hodgkin Lymphoma<sup>21</sup>

\*\*Based on gnomAD v3.0 genome

Abbreviations: MAF=minor allele frequency; NC = non-coding; REG PHRED= phred-scaled RegBase functional score; CAN PRED= phred-scaled RegBase cancer driver score; PAT PHRED= phred-scaled RegBase pathogenic score; FIMO = *in silico* motif testing of REF vs ALT allele
